# Supplementary material for: High diversity of Morchella and a novel lineage of the Esculenta clade from the north Qinling Mountains revealed by GCPSR-based study
Source: PubMed Central journal article supplement (PMC6934834; doi:10.1038/s41598-019-56321-1), 2019-12-27

# **High diversity of *Morchella* and a novel lineage of the Esculenta clade from the north Qinling Mountains revealed by GCPSR-based study**

**Phonepaserd Phanpadith<sup>1</sup>, Zhongdong Yu<sup>1,\*</sup> and Tao Li<sup>2</sup>**

<sup>1</sup> College of Forestry, Northwest A&F University, Yangling, Shaanxi 712100, China.

<sup>2</sup> Sichuan Province Forest and Grassland Pest Control and Quarantine Station, Chengdu, 610082 China.

\* Correspondence: [yuzhongdong001@nwsuaf.edu.cn](mailto:yuzhongdong001@nwsuaf.edu.cn); Tel.: +0086 13772142978

## SUPPLEMENTAL FIGURE LEGENDS

### Supplemental figure 1. Morphology of *Verpa bohemica*.

(A) asci, double wall, (B-C) asci and paraphysis, paraphysis with more than 3 septals is longer than the ascus (D) two ascospores in each ascus, and thickened at the spore apic.

### Supplemental figure 2. Phylogenetic tree based on *LSU* sequence region.

Note: Tree covered 157 sequences (contained 56 phylopecies of true morels, *Verpa* sp) were constructed by Maximum likelihood (ML) method. Bootstrap values 50% were shown on branches. Collections of *Morchella* spp. species, inclusive of a *Verpa bohemica* from Qinling mountain were marked with red dots were the putative Qinling linkage and four unidentified collections. Phylopecies were assigned according to Du et al. (2012a, 2012b); O'Dennet al. (2011) and Taskin et al. (2012).

### Supplemental figure 3. Phylogenetic tree based on *ITS+LSU* sequence regions.

Note: Tree covered 156 sequences (contained 56 phylopecies of true morels, *Verpa* sp) were constructed by Maximum likelihood (ML) method. Bootstrap values  $\geq 50\%$  were shown on branches. Collections of *Morchella* spp. species, inclusive of a *Verpa bohemica* from Qinling mountain were marked with red dots were the putative Qinling linkage and four unidentified collections. Phylopecies were assigned according to Du et al. (2012a, 2012b); O'Dennet al. (2011) and Taskin et al. (2012).

Supplemental figure 1. Morphology of *Verpa bohemica*

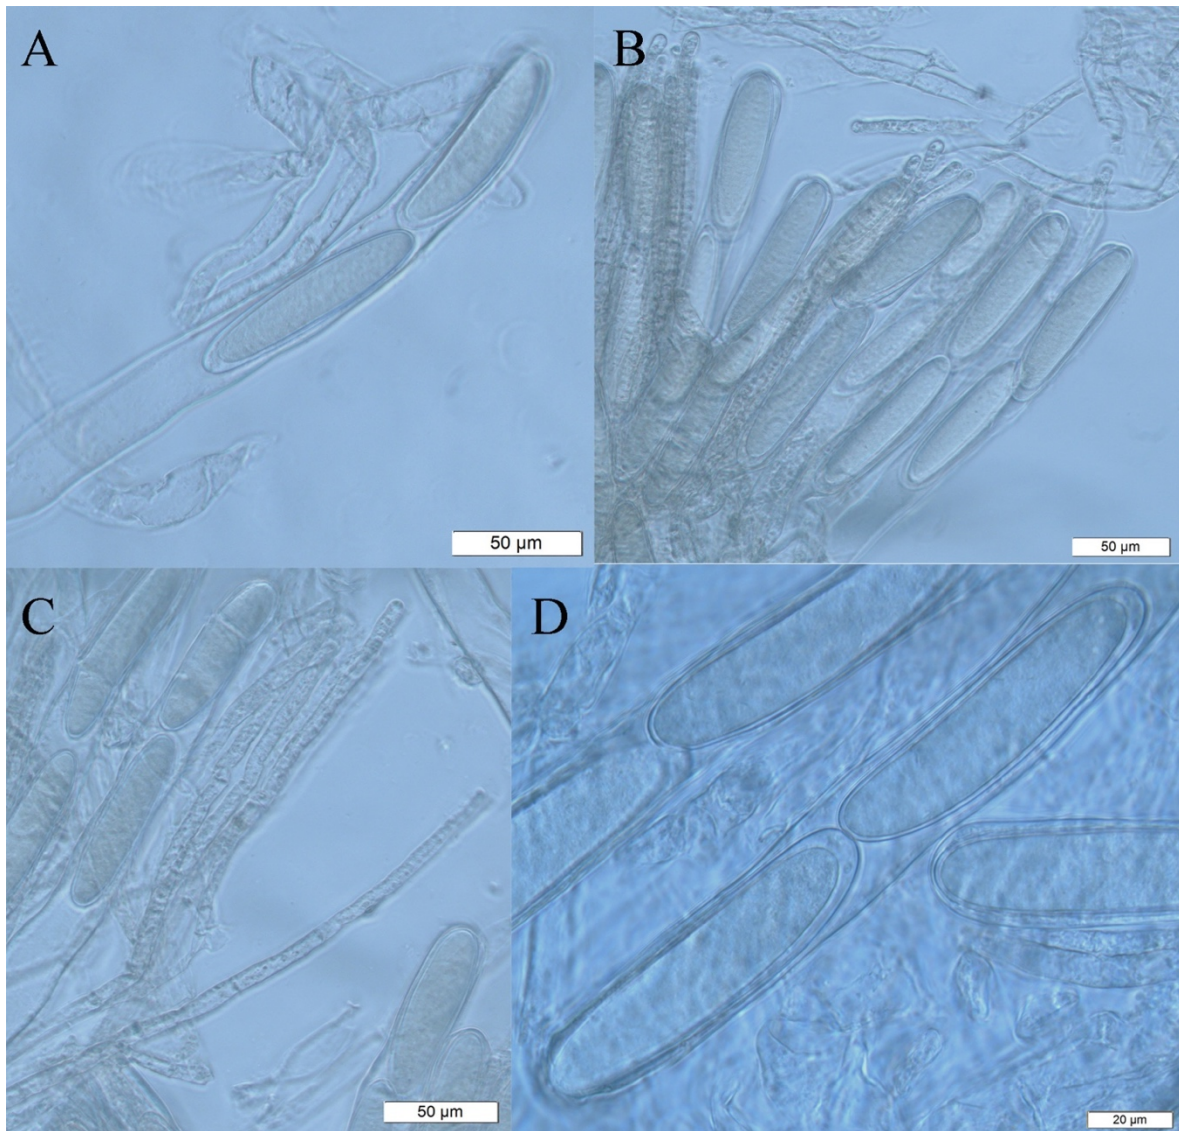



Supplemental figure 3. Phylogenetic tree based on *ITS+LSU* sequence regions

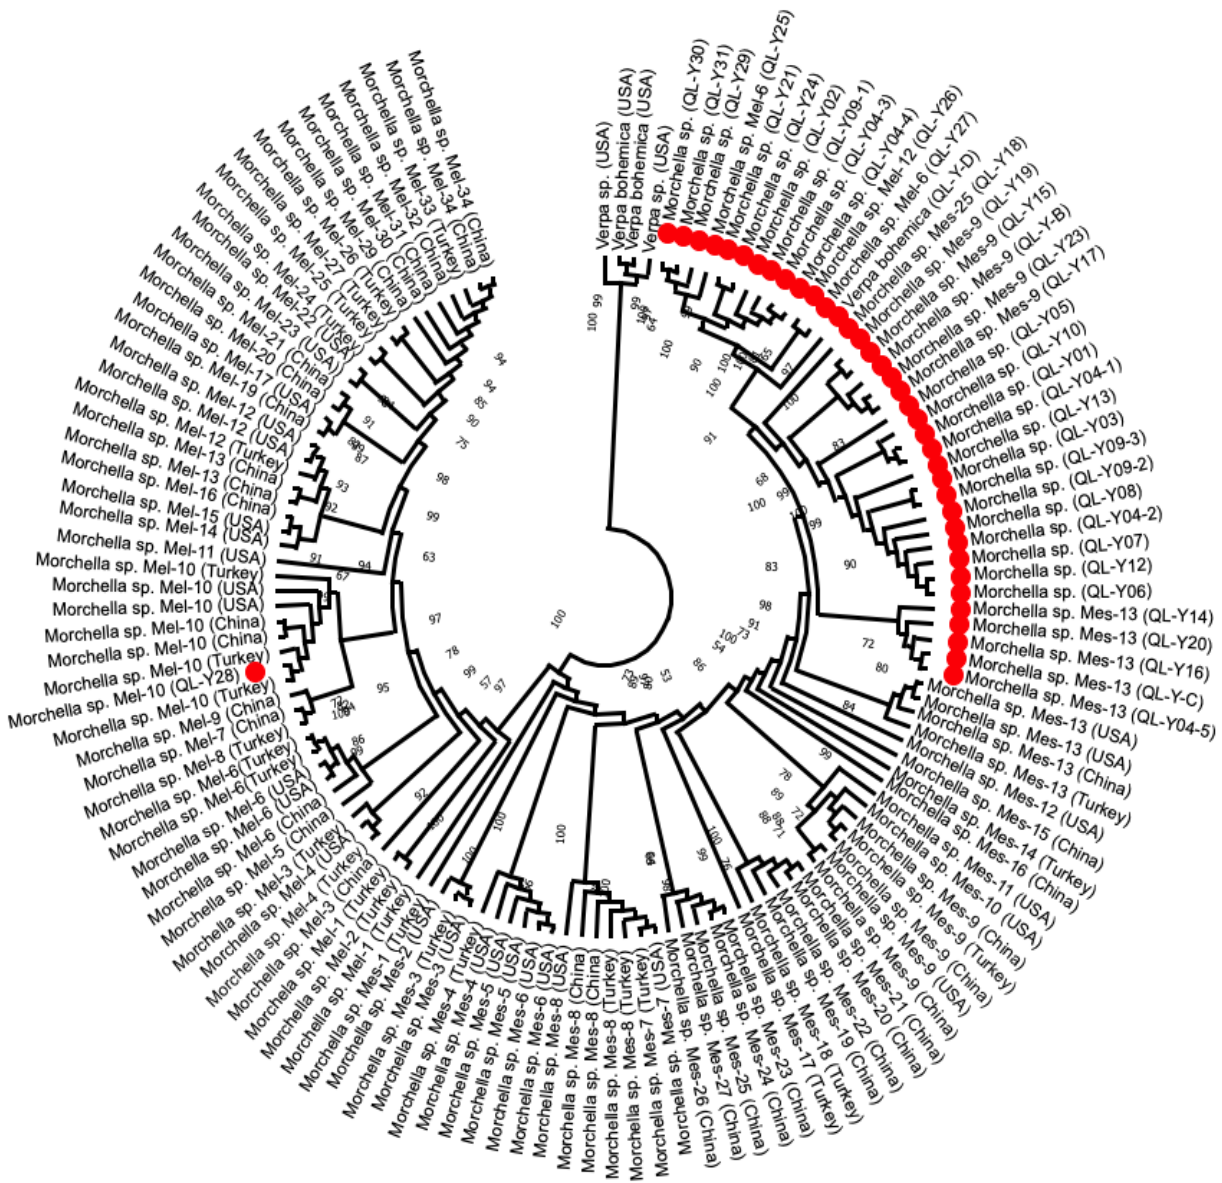

Supplement: 41598_2019_56321_MOESM1_ESM.pdf [file 41598_2019_56321_MOESM1_ESM.pdf]
